# Supplementary material
Source: PubMed Central journal article supplement (PMC5833184)
Supplement: DS_10.1177_0022034517735094.pdf [file DS_10.1177_0022034517735094.pdf]

# Fibrocartilage Stem Cells Engraft and Self-Organize into Vascularized Bone

J. Nathan, A. Ruscitto, S. Pylawka, A. Sohraby, C.J. Shawber, and M.C. Embree

## Appendix

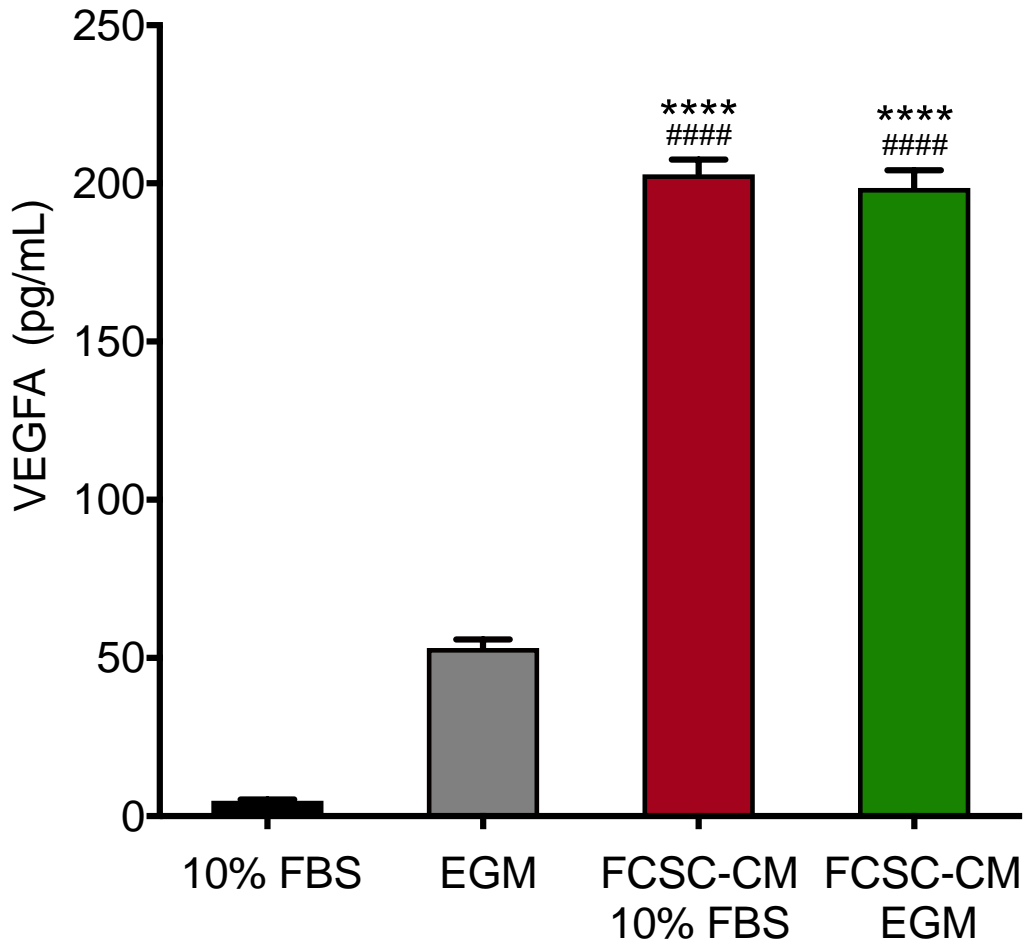

**Supplemental Figure 1: FCSCs secrete VEGF-A.** ELISA was used to measure VEGF-A (pg/mL) in FCSC-conditioned media 3 days after reaching 100% confluency in 10%FBS and endothelial growth media (EGM). Data are mean concentration VEGF-A in FCSC-conditioned media normalized to VEGF-A contained in corresponding media and relative to 10% FBS or EGM  $\pm$  SD; n=3 experiments; \*p $\leq$ 0.03, \*\*p $\leq$ 0.002, \*\*\*p $\leq$ 0.0002, \*\*\*\*p $\leq$ 0.0001; two-way ANOVA followed by Tukey's post hoc test.

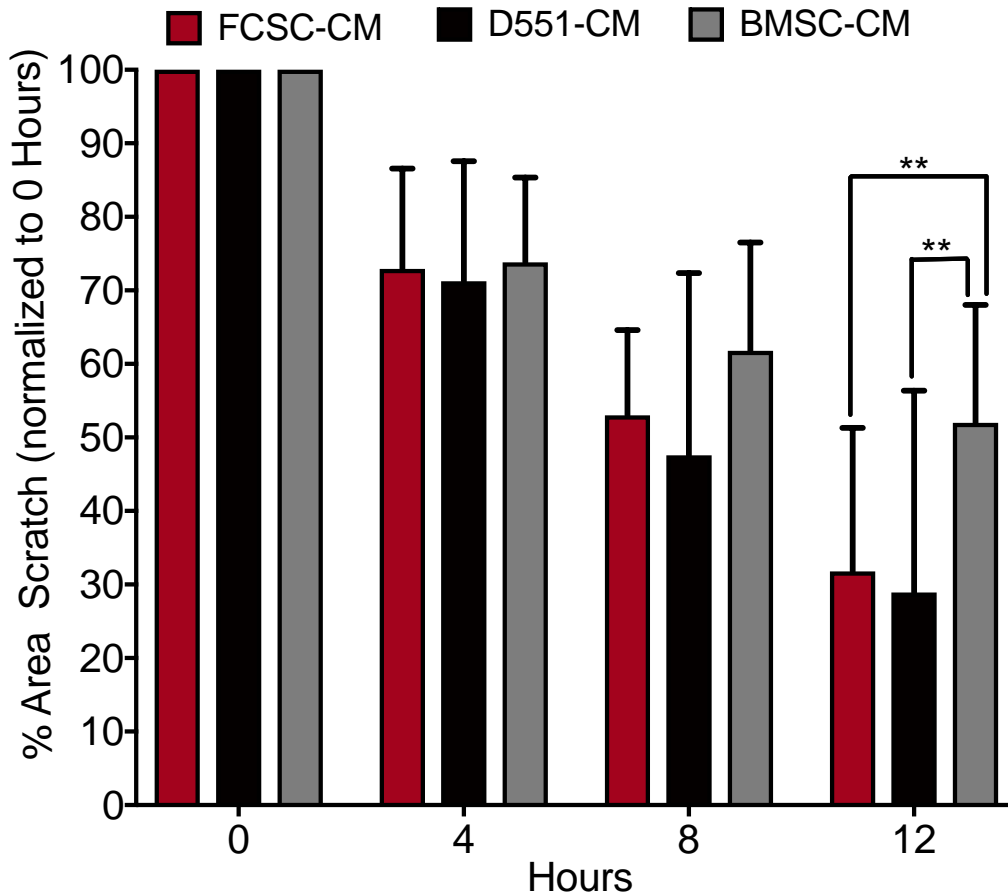

**Supplemental Figure 2: FCSCs do not enhance HUVEC migration in scratch assay.**

Scratch assay was used to measure HUVEC migration cultured conditioned media derived from fibrocartilage stem cells (FCSC-CM), and compared to D551 fibroblasts (D551-CM) and bone marrow stromal cells (BMSC-CM) every 4 hours for 12 hours. Data are mean  $\pm$  SD; n=12; \*p $\leq$ 0.03, \*\*p $\leq$ 0.002, \*\*\*p $\leq$ 0.0002, \*\*\*\*p $\leq$ 0.0001; two-way ANOVA followed by Tukey's post hoc test.

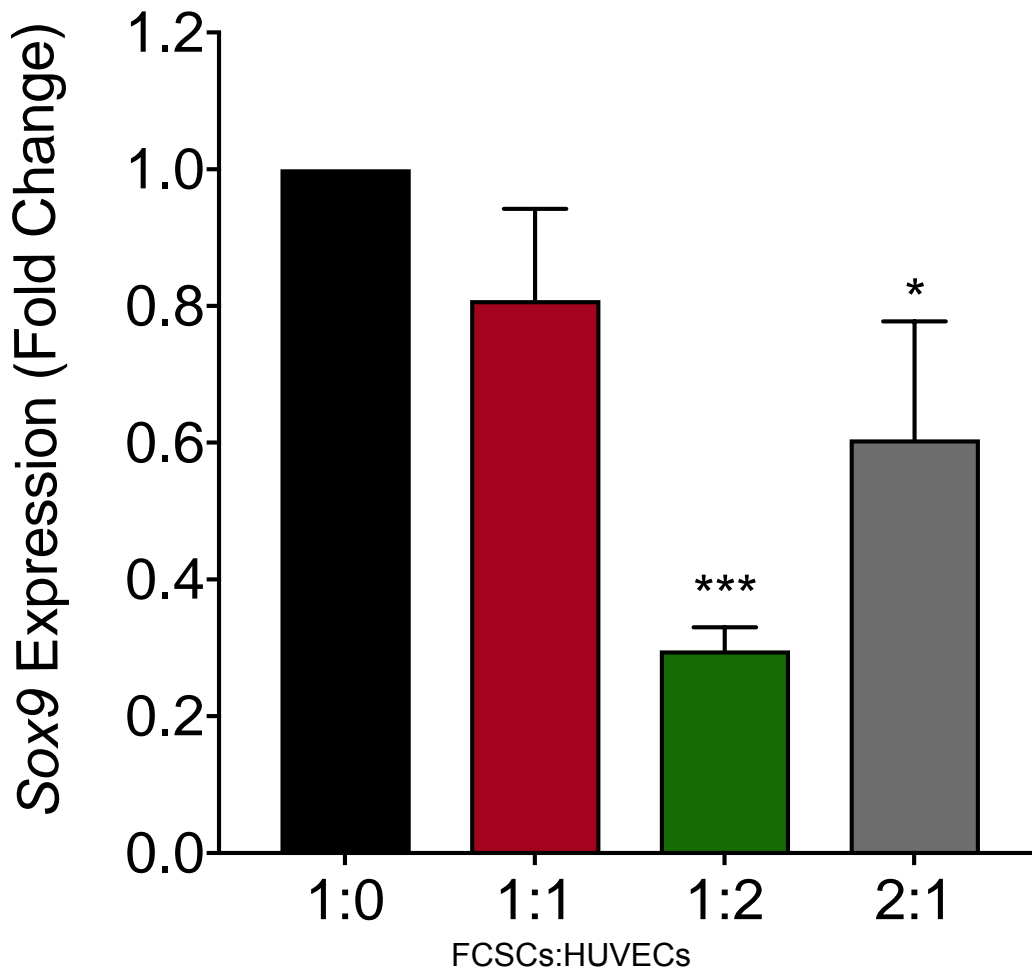

**Supplemental Figure 3: HUVECs inhibit expression of cartilage transcription factor Sox9 in FCSCs.** FCSCs and HUVECs were mixed together at varying ratios in suspension, and cultured together using the same cell number in osteogenic media for 1 week. Data is qRT-PCR of FCSCs for Sox9. Data are normalized to *GAPDH* and mean fold change relative to 1:0 FCSCs alone  $\pm$  SD; n=3 experiments; \* $p \leq 0.03$ ; \*\*\* $p \leq 0.0002$ ; two-way ANOVA followed by Tukey's post hoc test.

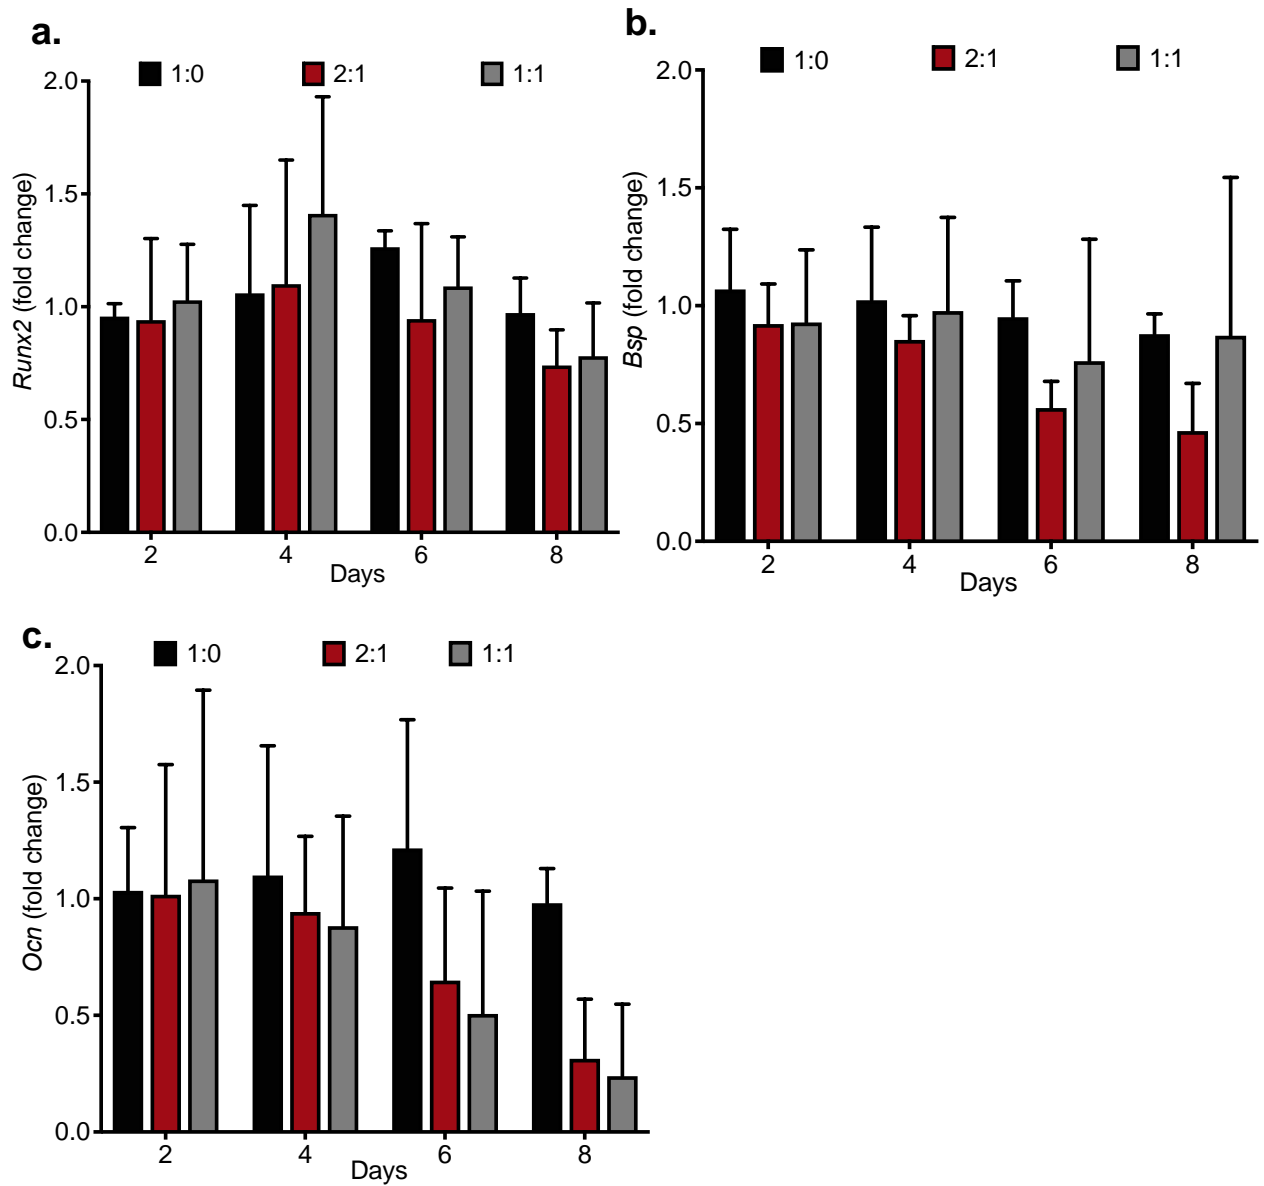

**Supplemental Figure 4: HUVECs do not enhance osteogenic differentiation of FCSCs in non-contact Transwell® assay.** qRT-PCR of (a) *Runx2*, (b) *Bsp* and (c) *Ocn* in FCSCs cultured on transwell inserts with various concentrations of HUVECs after 2, 4, 6, and 8 days. Data are normalized to GAPDH and mean fold change relative to FCSCs alone  $\pm$  SD; n=4 experiments; two-way ANOVA followed by Tukey's post hoc test.
